# Supplementary material for: Antiambipolar, ambipolar, and unipolar charge transport in organic transistors based on a single vertical P–N heterointerface
Source: Royal Society of Chemistry journal article supplement (doi:10.1039/d3tc00492a), 2023-01-01
Supplement: d3tc00492a1.pdf [file d3tc00492a1.pdf]

## Supporting Information

### Antiamipolar, ambipolar, and unipolar charge transport in organic transistors based on a single vertical P-N heterointerface

Guidong Wang, Dong Li, Xinyu Wang, Yu Zhang, Hao Zhang, and Jun Wang\*

Guidong Wang, Dong Li, Xinyu Wang, and Jun Wang

College of Science, Shanghai Institute of Technology, Shanghai 201418, China

E-mail: [wangj@sit.edu.cn](mailto:wangj@sit.edu.cn)

Yu Zhang, Hao Zhang

College of Electronics and Information Science, Fujian Jiangxia University, Fuzhou

350108, China

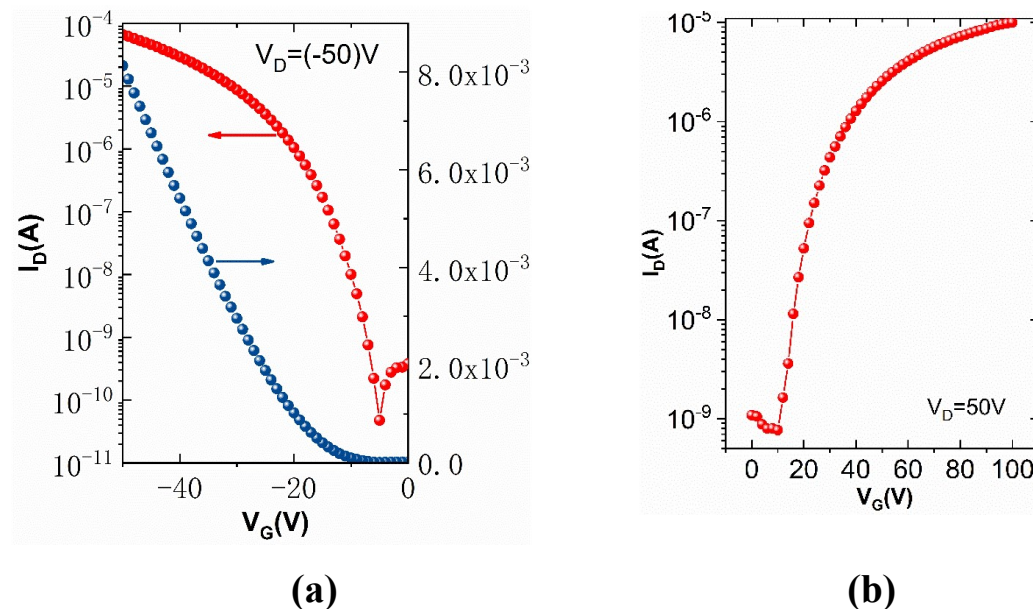

**Figure S1.** The transfer characteristics of (a) pentacene (b)  $F_{16}CuPc$  as the active layer.

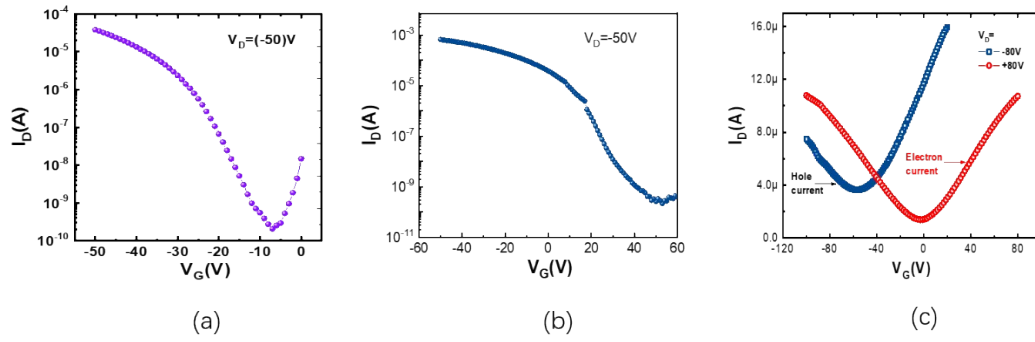

**Figure S2.** The transfer characteristics of OHJT with various pentacene thicknesses (a) >20 nm (b) 5~20nm (c) 1.5-3 nm
